## Residual Confounding in Observational Studies

**To the Editor:**—I read the study by Fellahi JL *et al.* titled “Perioperative use of dobutamine in cardiac surgery and adverse cardiac outcome” with great interest.<sup>1</sup> This study showed that the use of dobutamine was associated with adverse outcomes in adult cardiac surgery, and the authors concluded that these results suggest that dobutamine should only be administered when the benefit is judged to outweigh the risks. Although the study is interesting and the results are provocative, we need to be careful how to examine these results before we conclude that these results suggest that dobutamine may be harmful. First, we can be sure from the data of this observational study that the group of patients who received dobutamine was sicker in both left ventricular function and EURO score. Therefore, it is vital to know whether the propensity score (probability of using dobutamine) was a significant variable in the second method of logistic regression analysis when the propensity score was used as a separate covariate. If propensity score was a significant variable in determining adverse outcome after cardiac surgery in the logistic regression analysis, it would suggest that residual confounding due to “selection bias” caused by using dobutamine in a sicker group of patients was still present, despite the propensity score was used in the multivariate analysis.<sup>2</sup> We definitely need this data to be sure whether any residual confounding was present, and if residual confounding is present, it may at least, in part, explain the results why the use of dobutamine was associated with a poorer outcome. Furthermore, the authors should also discuss the possibility of residual confounding from omitting confounders as a limitation of an observational study.<sup>3</sup> Second, the conclusion of only using dobutamine when benefit is judged to outweigh the risks is not helpful to both practicing anesthesiologists and researchers. The data presented in this study

showed that dobutamine was used predominantly in patients with a lower ejection fraction or those with left ventricular dysfunction in their cohort. This practice will remain unchanged in many cardiothoracic centers after knowing the results of this study because this is the group of cardiac patients most likely to have benefits from the use of dobutamine. I believe a more appropriate, balanced, and constructive conclusion from the data of this study is that an adequately powered randomized controlled trial is needed to clarify the risks and benefits of dobutamine in patients with different degrees of left ventricular function in adult cardiac surgery.<sup>4</sup>

**Kwok Ming Ho, M.P.H., F.R.C.P., F.J.F.I.C.M., F.A.N.Z.C.A.,** Royal Perth Hospital, Perth, Australia. kwok.ho@health.wa.gov.au

## References

1. Fellahi JL, Parienti JJ, Hanouz JL, Plaud B, Riou B, Ouattara A: Perioperative use of dobutamine in cardiac surgery and adverse cardiac outcome: propensity-adjusted analyses. *ANESTHESIOLOGY* 2008; 108:979–87
2. Joffe MM, Rosenbaum PR: Invited commentary: propensity scores. *Am J Epidemiol* 1999; 150:327–33
3. Weitzen S, Lapane KL, Toledano AY, Hume AL, Mor V: Weaknesses of goodness-of-fit tests for evaluating propensity score models: the case of the omitted confounder. *Pharmacoepidemiol Drug Saf* 2005; 14:227–38
4. Deeks JJ, Dinnes J, D'Amico R, Sowden AJ, Sakaravitch C, Song F, Petticrew M, Altman DG: International Stroke Trial Collaborative Group; European Carotid Surgery Trial Collaborative Group. Evaluating non-randomised intervention studies. *Health Technol Assess* 2003; 7:iii–x, 1–173

(Accepted for publication October 9, 2008.)

**In Reply:**—We would like to thank Dr. Ho for his interest in our study.<sup>1</sup> The propensity score used as a covariable in the second logistic regression model (covariance analysis) was not significantly associated with adverse cardiac outcome ( $P < 0.15$ ), as already mentioned in the footnote of table 4. Regardless of its  $P$  value, we disagree with Dr. Ho that a significant propensity score would suggest residual confounding and the reference cited do not support this statement. Dr. Ho is correct when he notes that dobutamine was used predominantly in patients with a lower preoperative ejection fraction. This fact, however, does not necessarily mean that all these patients should have required inotropic support at the termination of cardiopulmonary bypass. The lack of cardiac monitoring to guide inotropic use is a major problem in daily practice, leading to possible inappropriate use of dobutamine for many patients undergoing cardiac surgery. Moreover, both EuroSCORE and left ventricular ejection fraction were relatively well balanced in table 3, which compared baseline characteristics of the subsample after matching groups on the propensity score.<sup>2</sup> We believe that using multiple ways of propensity score adjustment with similar conclusions increases the internal validity of the present work. Of course, we agree with Dr. Ho that unknown confounders can limit the interpretation of any observational study, as we commented in the discussion section of the article, second paragraph.

At last, we would like to clarify an important remark pointed out by John Butterworth, M.D., in the Editorial View that accompanied

our article.<sup>3</sup> We have reported the results of a sensitivity analysis after exclusion of “those patients to whom nearly every clinician would administer a positive inotropic drug” with consistent results.

We have heard so many clinicians say regarding low doses of dobutamine: “If it does not help, it cannot hurt.” We believe it is high time to change clinical practices and elaborate guidelines for the perioperative use of inotropic agents in cardiac surgery. We also hope our study will stimulate research to confirm or refute our hypothesis-generating data, including replication in other populations. In this line, the results of our study now make the concept of a randomized trial ethically feasible.

**Jean-Luc Fellahi, M.D., Ph.D.,\* Jean-Jacques Parienti, M.D., Ph.D.** \*Centre Hospitalier Privé Saint-Martin, Caen, France. jean-luc.fellahi@gdsnb.gesante.fr

## References

1. Fellahi JL, Parienti JJ, Hanouz JL, Plaud B, Riou B, Ouattara A: Perioperative use of dobutamine in cardiac surgery and adverse cardiac outcome: Propensity-adjusted analyses. *ANESTHESIOLOGY* 2008; 108:979–87
2. Austin PC: A critical appraisal of propensity-score matching in the medical literature between 1996 and 2003. *Stat Med* 2008; 27:2037–49
3. Butterworth J: Dobutamine: too dangerous for routine administration? *ANESTHESIOLOGY* 2008; 108:973–4

(Accepted for publication October 9, 2008.)

## Difficult Tracheal Intubation and a Low Hyoid

*To the Editor:*—I would like to congratulate Tsuike and his colleagues on their recent publication examining the upper airway imbalance of airway soft tissue and craniofacial size.<sup>1</sup> They have postulated a caudal expansion of excessive soft tissue from the maxilla-mandibular enclosure downwards into the submandibular space. This leads to a caudal displacement of the hyoid and an increase in the mandibulo-hyoid distance. Previously, some of these authors<sup>2</sup> have focused on an increased submandibular angle leading to difficult tracheal intubation.

Tsuike's work is in agreement with Chou and Wu's work<sup>3,4</sup> which proposed that a relatively short mandibular ramus and a caudally positioned hyoid causes a large "hypopharyngeal tongue." This in turn is associated with both obstructive sleep apnoea and difficult tracheal intubation.

Tsuike stated that one of the limitations of their study was that it involved only Japanese patients. The study by Lam and workers<sup>5</sup> that is referenced by Tsuike described a crowded posterior oropharynx and a steep thyromental plane (that is an increased submandibular angle) in Hong Kong Chinese and Caucasians predicts obstructive sleep apnoea though the Chinese group had a higher Mallampatti score, shorter thyromental distance and increased thyromental angle.

Horton and workers in 1990 described a "peardrop" phenomenon seen with x-ray where the laryngoscopy blade causes compression of the tongue and its postero-inferior displacement results in airway

obstruction. The epiglottis is also displaced posteriorly against the posterior wall of the pharynx causing difficult tracheal intubation.

It would therefore appear that there is a now a link between an anatomical relationship of a low lying hyoid, increased submandibular angle and difficult tracheal intubation.

**Keith B. Greenland, F.A.N.Z.C.A.,** Royal Brisbane and Women's Hospital, Brisbane, Australia. french9a@yahoo.co.uk

## References

1. Tsuike S, Isono S, Ishikawa T, Yamashiro Y, Tatsumi K, Nishino T: Anatomical balance of the upper airway and obstructive sleep apnea. *ANESTHESIOLOGY* 2008; 108:1009-15
2. Suzuki N, Isono S, Ishikawa T, Kitamura Y, Takai Y, Nishino T: Submandible angle in nonobese patients with difficult tracheal intubation. *ANESTHESIOLOGY* 2007; 106:916-23
3. Chou HC, Wu TL: Mandibulo-hyoid distance in difficult laryngoscopy. *Br J Anaesth* 1993; 71:335-9
4. Chou HC, Wu TL: Large hypopharyngeal tongue: a shared anatomic abnormality for difficult mask ventilation, difficult intubation, and obstructive sleep apnea? *ANESTHESIOLOGY* 2001; 94:936-7
5. Lam B, Ip MS, Tench E, Ryan CF: Craniofacial profile in Asian and white subjects with obstructive sleep apnoea. *Thorax* 2005; 60:504-10

(Accepted for publication October 9, 2008.)

*In Reply:*—We thank Dr. Greenland for his thoughtful comments on our article. Difficult intubation is common in obstructive sleep apnea patients and, *vice versa*, obstructive sleep apnea is common in patients with difficult intubation. He suggests a low hyoid and increased submandibular angle as common anatomical features for both obstructive sleep apnea and difficult tracheal intubation. While we completely agree with the strong linkage between difficult intubation and obstructive sleep apnea, we believe these are independent pathogenic conditions caused by different structural mechanisms.

Certainly, the low lying hyoid *per se* can result in difficult tracheal intubation, since it impairs an essential step during direct laryngoscopy for improving the laryngeal view, *i.e.*, vertical arrangement of the mandible, tongue base, and larynx to the facial line as we recently reported.<sup>1</sup> In contrast, obstructive sleep apnea can be developed in subjects with normal hyoid bone position. It is of note that hyoid position of apneic patients with large maxillo-mandible size did not differ from that of nonapneic persons as shown in the table 3 of the article.<sup>2</sup> Infants have more collapsible pharyngeal airways than adults although the hyoid bone locates more cranially in infants than adults.<sup>3</sup> Pharyngeal patency is improved by neck extension and impaired by neck flexion, whereas the hyoid bone locates more cranially during neck flexion than during neck extension.<sup>4,5</sup> The hyoid bone is mobile only in humans; other mammals rarely have obstructive apnea during sleep while obstructive sleep apnea is common in humans, implying possible involvement of mobility of the hyoid bone in pathogenesis of obstructive sleep apnea.<sup>6</sup> However, we do not believe that the low hyoid *per se* increases pharyngeal collapsibility. Similarly, we consider that increased submandible angle alone contributes little to mechanisms of difficult tracheal intubation, since tracheal intubation is not difficult in most obese patients in whom increased submandible angle is a common feature.<sup>7</sup>

The presence of common anatomical abnormalities does indicate strong linkage between difficult tracheal intubation and obstructive sleep apnea. However, it does not indicate presence of common pathogenesis between them, nor their significant roles in the pathogenesis.

**Shiroh Isono, M.D.,\* Satoru Tsuike, D.D.S.** \*Chiba University, Chiba, Japan. shirohisono@yahoo.co.jp

## References

1. Kitamura Y, Isono S, Suzuki N, Sato Y, Nishino T: Dynamic interaction of craniofacial structures during head positioning and direct laryngoscopy in anesthetized patients with and without difficult laryngoscopy. *ANESTHESIOLOGY* 2007; 107:875-83
2. Tsuike S, Isono S, Ishikawa T, Yamashiro Y, Tatsumi K, Nishino T: Anatomical balance of the upper airway and obstructive sleep apnea. *ANESTHESIOLOGY* 2008; 108:1009-15
3. Isono S, Tanaka A, Ishikawa T, Nishino T: Developmental changes in collapsibility of the passive pharynx during infancy. *Am J Respir Crit Care Med* 2000; 162:832-6
4. Isono S, Tanaka A, Tagaito Y, Ishikawa T, Nishino T: Influences of head positions and bite opening on collapsibility of the passive pharynx. *J Appl Physiol* 2004; 97:339-46
5. Isono S: Optimal combination of head, mandible and body positions for pharyngeal airway maintenance during perioperative period: lesson from pharyngeal closing pressures. *Semin Anesth* 2007; 26:83-93
6. Morgan TD, Remmers JE: Physiology and animal models: Uninhibited survey, Obstructive Sleep Apnea Pathophysiology, Comorbidities, and Consequences. Edited by Kushida CA. New York, Informa Health Care USA Inc., 2007, pp 61-80
7. Suzuki N, Isono S, Ishikawa T, Kitamura Y, Takai Y, Nishino T: Submandible angle in nonobese patients with difficult tracheal intubation. *ANESTHESIOLOGY* 2007; 106:916-23

(Accepted for publication October 9, 2008.)

## Nasal Ventilation Is More Effective than Combined Oral-Nasal Ventilation during Induction of General Anesthesia in Adult Subjects

*To the Editor:*—I applaud the recent landmark investigation by Liang *et al.*<sup>1</sup> regarding nasal mask ventilation. It is a very interesting and innovative work. The abstract was so fabulous that it led me to read article itself. The points that are not mentioned in the abstract are Bispectral Index monitoring and the number of breaths tried in each trial. Before reading the article, I was even thinking about the depth of anesthesia and its impact on metabolism and carbon dioxide production. After reading, I found out that the brevity of trial time and the use of Bispectral Index exclude the alteration of metabolism. I appreciate their work; I'd like some points to be clarified, though.

What are the criteria of the efficacy in different methods and routs of ventilation? I'd like to know why the researchers have used the term *effective* while they have worked on *airway patency*. Shall we use a pressure limiting mode of ventilation first and then use the volume of expired breathes as the end point measurement of the study to represent its efficacy? According to figure 2, the tidal volumes exhaled are much smaller in combined mode than nasal one; this is because of the high airway pressure that exceeds the limiting pressure of 25 cm H<sub>2</sub>O. When there is no inhalation, how can we expect exhalation? It is quite obvious that the volume of breaths exhaled is a main factor when we measure the volume of exhaled carbon dioxide. In some cases, the authors have used carbon dioxide content even when exhaled tidal volume is near zero; in about half cases, the same carbon dioxide content has been used when the exhaled tidal volume is less than 100 ml. These small volumes are less than anatomical dead space, and in such a condition, nobody expects the above-mentioned carbon dioxide concentration to represent alveoli.

The main aim of this article is to study the patency of airway during anesthesia. Since the above-mentioned researchers had employed tidal volume, carbon dioxide content per breath, and peak inspiratory pressure, they were in search of airway patency and severity of airway resistance. Airway patency can be measured differently. Why not to ventilate in a pressure-cycled mode and measure expiratory tidal volume? Why not to ventilate in a volume-cycled mode (without pressure limit) and measure peak pressure? Both will represent efficacy of ventilation. Higher tidal volumes in pressure preset and lower peak pressures in volume preset ventilation suggest lower airway resistance and more effective ventilation.

Why not to use other methods of investigating airway patency? Eastwood *et al.*<sup>2</sup> have used pressure-flow relationships of the upper airway (simultaneous measurements of nasopharyngeal, oropharyngeal, and hypopharyngeal and esophageal pressures) to show increased airway collapsibility during anesthesia. Crawford *et al.*<sup>3</sup> have employed magnetic resonance imaging to measure the dimensions of upper airway in infants during light propofol anesthesia. Nandi *et al.*<sup>4</sup> have been in favor of using conventional lateral radiography to investigate the changes induced by general anesthesia in the upper airway. These are merely some instances, while other methods have also been employed which I hope to be added to the similar future studies.

These researchers have examined their patients in the neutral position that seldom happens in real practice of anesthesia. The study hypothesis is based on overcoming difficult mask ventilation and we are almost sure that when confronting difficulty, the position of head and neck should be modified. For future studies, this study could be repeated in different head and neck positions. In another position, combined mode is probably a better way of ventilation than nasal one. As a result, it seems that it is a little bit soon to decide that "Nasal Ventilation Is More Effective than Combined Oral-Nasal Ventilation."

A question arises that whether the main locations of obstruction in the airway are the same in inhalation and exhalation or not. Is obstruction possible to happen just during exhalation; or is it less severe during inhalation? I wish the authors had used a measurement of inhaled volume as well to calculate the differences between inhaled and exhaled volumes. By not letting a complete exhalation occur, a new resistance only during exhalation may cause autopeep. Collapsibility of airway is dependent on the balance of compressing and opening forces which are different in inspiration and expiration as well as in spontaneous and mechanical ventilation. For instance, in obstructive sleep apnea, obstruction mainly happens during inspiration which is not the same in mechanical ventilation.

We all have the experience of manual face mask ventilation. At first, we use it simply; and just in the case of difficulty in ventilating, an oral or nasal airway is used; and, at the same time, head and neck position is modified. Suppose that a person is being ventilated only through face mask: the airway is mainly the nasal route and the mouth is closed. If ventilation is helpful and effective, there is no need for oral airway, one of whose characteristics is opening the nasal route by displacing the tongue. Is using nasal mask better than nasal route during face or combined mask ventilation? That is still the question.

**Sayed Mohammad Haghshenas, M.D.,** Bushehr University of Medicine, Bushehr, Iran. smhagh@yahoo.com

## References

1. Liang Yafen, Kimball William R, Kacmarek Robert M, Zapol Warren M, Jiang Yandong: Nasal Ventilation Is More Effective than Combined Oral-Nasal Ventilation during Induction of General Anesthesia in Adult Subjects. *ANESTHESIOLOGY* 2008; 108:998-1003
2. Eastwood Peter R, Szollosi Irene B, Platt Peter R, Hillman David R: Collapsibility of the Upper Airway during Anesthesia with Isoflurane. *ANESTHESIOLOGY* 2002; 97:786-93
3. Crawford Mark W, Rohan, Denise MB, Macgowan Christopher K, Yoo Shi-Joon, Macpherson Bruce A: Effect of Propofol Anesthesia and Continuous Positive Airway Pressure on Upper Airway Size and Configuration in Infants. *ANESTHESIOLOGY* 2006; 105:45-50
4. Nandi PR, Charlesworth CH, Taylor SJ, Nunn JF, Dore CJ: Effect of general anaesthesia on the pharynx. *British Journal of Anaesthesia* 1991; 66:157-62

(Accepted for publication October 9, 2008.)



*In Reply:*—We thank Dr. Haghshenas for his interest in our recent paper.<sup>1</sup> We appreciate his comments and suggestions and will address his concerns in this letter.

First, it is important to define the primary purpose of this study; to determine if nasal ventilation was more effective than oral-nasal ventilation in the patient with difficult mask ventilation. We created difficult mask ventilation by maintaining the patients' head in the neutral position since patients under anesthesia in head neutral position more likely have airway obstruction than in head extension position.<sup>2</sup> Our goal was not to identify the level of airway obstruction. We assumed that the level of obstruction would be constant if the head was kept in the neutral position regardless of the approach to mask ventilation. Thus our primary end point was the effectiveness of ventilation. We chose to determine effectiveness by the amount (volume) of carbon dioxide removed per breath using either ventilation approach. Other variables also contribute to the assessment of effective ventilation and indeed we also assessed tidal volume, peak inspiratory pressure and volume of carbon dioxide removed per breath/cm H<sub>2</sub>O pressure applied during the two approaches.

Dr. Haghshenas suggests that we should have used the pressure control mode instead of volume control mode. We believe that either approach to ventilatory assistance could have been used to assess the effectiveness of ventilation. However, each has its limitations. In pressure mode ventilation, pressure is limited and in volume mode ventilation, volume is limited. We believe we accounted for these limitations by determining the volume of gas delivered per cm H<sub>2</sub>O peak airway pressure. Peak inspiratory pressure was limited to about 25 cm H<sub>2</sub>O to avoid putting the studied patients at risk. Thus, we do not consider this a limitation of the study since avoidance of situations increasing the likelihood of gastric insufflations and subsequent vomiting and aspiration is always emphasized during mask ventilation. However, we concede that, if airway pressure is not a consideration, almost any patient can be effectively ventilated if airway pressure applied is high enough.

Since our data were determined by analyzing the expired volume from both the nose and mouth, we were able to determine the total volume of carbon dioxide removed. In addition, we calculated carbon dioxide removal regardless of the size of the tidal volume. Indeed even with an exhaled tidal volume smaller than anatomic dead space, carbon dioxide was still exhaled sometimes because inhalation and exhalation did not occur through the same orifice, nose or mouth.<sup>1,3</sup> We are aware of the three articles Dr. Haghshenas suggested and agree that they illustrate excellent methods to study upper airway obstruction. However, as indicated above the purpose of this study was not to determine the degree of airway obstruction but to determine the effectiveness of ventilation when the head was in the neutral position using two different approaches.

We agree with Dr. Haghshenas that the patient's head in the neutral position should not be a common scenario in routine anesthesia.

However, again our purpose was to compare to effectiveness of nasal *versus* oral-nasal mask ventilation in a nonoptimized situation. We also agree that nasal ventilation only needs to be assessed in other settings; however we disagree based on our data with Dr. Haghshenas statement that the "combined mode is probably a better way of ventilation than nasal." In fact, others have shown that during ventilation through a mouth-piece with head elevated 20 degree no flow is provided if the nose is closed.<sup>4</sup>

Dr. Haghshenas indicates that auto-positive end-expiratory pressure may have contributed to our negative results during full face mask ventilation. Although we did not measure auto-positive end-expiratory pressure, we believe that auto-positive end-expiratory pressure is an unlikely cause of the differences. None of the patients studied had chronic lung disease, the respiratory rate was maintained at 10/min and tidal volumes were normal or decreased. As a result in spite of the upper airway obstruction sufficient time was provided for exhalation of these relatively small tidal volumes. In addition, previous data from Safar *et al.* demonstrated that expiratory upper airway obstruction occurs if the anesthetized person was ventilated through the nose and the mouth was kept closed during exhalation.<sup>5</sup> In our study, we kept the mouth open during both combined and nasal only ventilation. Finally even if auto-positive end-expiratory pressure did develop during full facemask ventilation, it can be considered part of the problem with the difficult airway created by the neutral position and in this setting nasal ventilation produced better results than full face mask ventilation.

Finally, as Dr. Haghshenas's questions imply, this is simply the beginning of work exploring the use of nasal ventilation during anesthesia and considerably more work must be done before this approach can be recommended for routine practice.

**Yandong Jiang, M.D., Ph.D.,\* Robert M. Kacmarek, Ph.D., R.R.T.** \*Massachusetts General Hospital and Harvard Medical School, Boston, Massachusetts. yjiang@partners.org

## References

1. Liang Y, Kimball WR, Kacmarek RM, Zapol WM, Jiang Y: Nasal ventilation is more effective than combined oral-nasal ventilation during induction of general anesthesia in adult subjects. *ANESTHESIOLOGY* 2008; 108:998-1003
2. Safar P, Escarraga LA, Chang F: Upper airway obstruction in the unconscious patient. *J Appl Physiol* 1959; 14:760-4
3. Jiang Y, Liang Y, Kacmarek RM: The principle of upper airway unidirectional flow facilitates breathing in humans. *J Appl Physiol* 2008; 105:854-8
4. Hirsch J, Fuhrer I, Kuhly P, Schaffartzik W: Preoxygenation: a comparison of three different breathing systems. *Br J Anaesth* 2001; 87:928-31
5. Morikawa S, Safar P, DeCarlo J: Influence of the head-jaw position upon upper airway patency. *ANESTHESIOLOGY* 1961; 22:265-70

(Accepted for publication October 9, 2008.)

## Appropriate Endotracheal Tube Placement in Children: Don't Throw Away Your Stethoscopes Yet!

*To the Editor:*—We read with interest the recent article by Dr. Hunyady and colleagues.<sup>1</sup> While we acknowledge that mathematical formulae based on morphometric data may be useful guides, we caution against applying these formulae in lieu of clinical assessment. We conducted a randomized clinical trial to compare three common methods of endotracheal tube (ETT) placement: 1) deliberate mainstem

intubation with subsequent withdrawal of the ETT 2 cm above the carina ("mainstem" method); 2) alignment of the double black line marker near the ETT tip at the vocal cords ("marker" method); or 3) placement of the ETT at a depth determined by the formula: ETT depth (cm) = 3 times ETT size (mmID) ("formula" method).<sup>2</sup> In our study, the formula method only placed the ETT at the appropriate depth 42%

of the time. In addition, we retrospectively evaluated the efficacy of another formula, ETT depth (cm) = Age(yrs)/2 + 12,<sup>3</sup> but appropriate placement would have been achieved only 42% of the time as well. Identification of the carina *via* auscultation, the mainstem method, was the preferred technique (73%,  $P = 0.006$  vs. the formula method).<sup>2</sup>

Although our study did not specifically examine the efficacy of the Morgan and Steward formula,<sup>4</sup> neither did the study by Hunyady *et al.*<sup>1</sup> The authors' conclusion that the "... Morgan formula provides good guidance for intubation in children ..." is extrapolated based on their measurements and calculations.<sup>1</sup> The authors do not specify which technique was used to initially determine ETT depth in their study subjects or report the rates of correct *versus* incorrect placement for the actual placement methods used. Based on the estimates by Hunyady *et al.*, the Morgan and Steward formula would have placed the ETT tip on average at the 90<sup>th</sup> percentile for front teeth-to-carina distance and < 0.5 cm from the carina in 13 of their youngest subjects.<sup>1</sup> This is concerning since, as the authors astutely point out, the ETT is subject to movement with neck flexion or extension which may result in inadvertent endobronchial ETT placement.<sup>5-7</sup>

Auscultation methods have their limitations as well,<sup>2,3</sup> and no clinical technique results in 100% success. When ETT placement is in question or when accurate ETT depth is mandatory for a particular surgical procedure (*i.e.*, prone position or head and neck surgery), we recommend intraoperative chest radiography, fluoroscopy, or fiberoptic bronchoscopy.

Anesthesiology 2009; 110:434

Copyright © 2009, the American Society of Anesthesiologists, Inc. Lippincott Williams & Wilkins, Inc.

**In Reply:**—We thank Dr. Mariano and colleagues for their comments. As stated in the article, we believe that "sole reliance on a specific formula is not advisable, and careful auscultation is necessary to ensure appropriate position."<sup>1</sup> The stethoscope is indeed a useful, albeit not infallible, tool.

The endotracheal tube (ETT) was positioned according to the preferred method of the attending anesthesiologist. The Morgan formula<sup>2</sup> (ETT length at front upper teeth [cm] =  $0.10 \times \text{height [cm]} + 5$ ) was therefore not used in all patients, but the actual ETT tip position was within  $\pm 5\%$  of the calculated Morgan formula distance in 138 of the 170 patients.

It is correct that we did not test different intubation depth formulas directly, instead we utilized the front teeth-to-carina data to assess whether different intubation formulas would result in bronchial intubation or not. We believe this is a reasonable approach. It is our understanding that Mariano *et al.* used a similar method to assess the appropriateness of alternative ETT positions in their study.<sup>3</sup>

We agree with Mariano *et al.*<sup>3</sup> and Phipps *et al.*<sup>4</sup> that the  $3 \times$  ETT size formula can be misleading, perhaps because "correct" ETT size varies with tracheal dimensions and depends on whether a cuffed or uncuffed ETT is used. In our patients, three neonates intubated with 3.5 uncuffed ETTs would have been bronchially intubated if this formula had been applied.

The Morgan formula, on the other hand, is based on the reasonable assumption that the length of the airway tends to increase linearly with the length of the individual. No patient would have been bronchially intubated had the Morgan formula been applied, but thirteen infants and one older child (8%) would have had an ETT tip-to-carina distance of less than 0.5 cm. Although this is less than the 12% noted by Mariano *et al.* when using the "mainstem method,"<sup>3</sup> we share their concern. As

**Edward R. Mariano, M.D.,\* Chandra Ramamoorthy, M.B.B.S., Gregory B. Hammer, M.D.** \*University of California, San Diego Medical Center, San Diego, California. ermariano@ucsd.edu

## References

1. Hunyady AI, Pieters B, Johnston TA, Jonmarker C: Front teeth-to-carina distance in children undergoing cardiac catheterization. *ANESTHESIOLOGY* 2008; 108:1004-8
2. Mariano ER, Ramamoorthy C, Chu LF, Chen M, Hammer GB: A comparison of three methods for estimating appropriate tracheal tube depth in children. *Paediatr Anaesth* 2005; 15:846-51
3. Verghese ST, Hannallah RS, Slack MC, Cross RR, Patel KM: Auscultation of bilateral breath sounds does not rule out endobronchial intubation in children. *Anesth Analg* 2004; 99:56-8
4. Morgan GA, Steward DJ: A pre-formed paediatric orotracheal tube designed based on anatomical measurements. *Can Anaesth Soc J* 1982; 29:9-11
5. Donn SM, Kuhns LR: Mechanism of endotracheal tube movement with change of head position in the neonate. *Pediatr Radiol* 1980; 9:37-40
6. Rost JR, Frush DP, Auten RL: Effect of neck position on endotracheal tube location in low birth weight infants. *Pediatr Pulmonol* 1999; 27:199-202
7. Toung TJ, Grayson R, Saklad J, Wang H: Movement of the distal end of the endotracheal tube during flexion and extension of the neck. *Anesth Analg* 1985; 64:1030-2

(Accepted for publication October 9, 2008.)

mentioned in our paper, it might be helpful to use a modified Morgan formula in infants less than 3 months [ETT length at front upper dental ridge (cm) =  $0.10 \times \text{height (cm)} + 4$ ].<sup>1</sup> This does not abolish the risk for low ETT position; one 5-month-old and one 6-yr-old in our study would still have had an ETT tip-to-carina distance of less than 0.5 cm had this modification been added. Still, we have found that the ETT position seldom needs to be readjusted when these formulas are applied, and we therefore prefer to first tape the ETT in place and then confirm the position with auscultation.

We rarely use fluoroscopy, chest X-ray, or bronchoscopy to document the ETT position in the operating room. In our experience, intraoperative bronchial intubation is commonly precipitated by a cranial move of the carina, such as occurs during laparoscopic surgery, making such initial documentation less useful.

**Agnes I. Hunyady, M.D., Benjamin Pieters, D.O., Christer Jonmarker, M.D., Ph.D.\*** \*Seattle Children's Hospital, Seattle, Washington. christer.jonmarker@seattlechildrens.org

## References

1. Hunyady AI, Pieters B, Johnston TA, Jonmarker C: Front teeth-to-carina distance in children undergoing cardiac catheterization. *ANESTHESIOLOGY* 2008; 108:1004-8
2. Morgan GAR, Steward DJ: Linear airway dimensions in children: including those with cleft palate. *Can Anaesth Soc J* 1982; 29:1-8
3. Mariano ER, Ramamoorthy C, Chu LF, Chen M, Hammer GB: A comparison of three methods for estimating appropriate tracheal tube depth in children. *Pediatr Anesth* 2005; 15:846-51
4. Phipps LM, Thomas NJ, Gilmore RK, Raymond JA, Bittner TR, Orr RA, Robertson CL: Prospective assessment of guidelines for determining appropriate depth of endotracheal tube placement in children. *Pediatr Crit Care Med* 2005; 6:519-22

(Accepted for publication October 9, 2008.)

Anesthesiology 2009; 110:435

Copyright © 2009, the American Society of Anesthesiologists, Inc. Lippincott Williams &amp; Wilkins, Inc.

## Increasing Operating Room Throughput via Parallel Processing May Not Require Extra Resources

*To the Editor:*—We applaud the endorsement of improving operating room (OR) throughput by a variety of means, including parallel processing. (“Improving OR throughput is not simply a buzzword of the year, but an actual possibility.”)<sup>1</sup> However, we wish to stress that parallel processing does not necessarily require an increase in personnel or additional facilities as stated in the editorial. Indeed, substantial reduction in nonoperative time can be achieved by reallocating responsibilities of the OR staff during the nonoperative interval. Specifically, the circulating nurse can remain in the OR to accelerate the setup for the next case; the anesthesiologist and certified registered nurse anesthetist can divide responsibilities: one may accompany the patient to the recovery area, while the other prepares for the next case; and the housekeeping staff can begin its work after the incision is closed while the patient is still in the OR.<sup>2</sup> Another low-cost solution, based on

parallel processing is described by Cendan and Good.<sup>3</sup> Although more non-operative time can be reduced by using some of the other measures suggested, “pure” parallel processing is considerably less expensive, and can thus be used by any hospital.

**Maureen Harders, M.D., Mark A. Malangoni, M.D., Steven Weight, M.D., Tejbir Sidhu, M.D., Dan C. Krupka, Ph.D.,\* Warren S. Sandberg, M.D., Ph.D.** \*Twin Peaks Group, LLC, Lexington, Massachusetts. dan.krupka@twin-peaks-group.com

Dan C. Krupka is Managing Principal of Twin Peaks Group, LLC, Lexington, Massachusetts, a management consulting firm devoted to patient flow in health-care. He provided consulting services to MetroHealth Medical Center, Cleveland, Ohio, in 2005 in connection with the project described in the article in *Surgery*, which is cited in the submitted letter to the editor.

### References

1. Abouleish AE: Increasing Operating Room Throughput: Just Buzzwords for this Decade? *ANESTHESIOLOGY* 2008; 109:3–4
2. Harders M, Malangoni MA, Weight S, Sidhu T: Improving operating room efficiency through process redesign. *Surgery* 2006; 140:509–16
3. Cendan JC, Good M: Interdisciplinary work flow assessment and redesign decreases operating room turnover time and allows for additional caseload. *Arch Surg* 2006; 141:65–9

(Accepted for publication October 10, 2008.)

Anesthesiology 2009; 110:435

Copyright © 2009, the American Society of Anesthesiologists, Inc. Lippincott Williams &amp; Wilkins, Inc.

*In Reply:*—I thank Harders *et al.* for the comments and pointing out that some of the traditional efforts to improve operating room throughput can be considered to be “parallel processing.”<sup>1</sup> As noted by Harders *et al.*, improving individual functions and improving teamwork has always been essential to improving productivity independent from the actual industry or product, including the operating room.<sup>2</sup> In contrast, the editorial<sup>3</sup> and accompanying article<sup>4</sup> is focused on redesigning the larger process that goes beyond improving individual productivity and teamwork.

**Amr Abouleish, M.D.,** University of Texas Medical Branch, Galveston, Texas. aabouleish@utmb.edu

### References

1. Overdyk FJ, Harvey S, Fishman R, Shippey F: Successful strategies for improving operating room efficiency at academic institutions. *Anesth Analg* 1998; 86:896–906
2. Cendan JC, Good M: Interdisciplinary work flow assessment and redesign decreases operating room turnover time and allows for additional caseload. *Archives of Surgery* 2006; 141:65–9
3. Abouleish AE: Increasing Operating Room Throughput: Just Buzzwords for This Decade? *ANESTHESIOLOGY* 2008; 109:3–4
4. Smith MP, Sandberg WS, Foss J, Massoli K, Kanda M, Barsoum W, Schubert A: High-throughput operating room system for joint arthroplasties durably outperforms routine processes. *ANESTHESIOLOGY* 2008; 109:25–35

(Accepted for publication October 10, 2008.)

Anesthesiology 2009; 110:435–6

Copyright © 2009, the American Society of Anesthesiologists, Inc. Lippincott Williams &amp; Wilkins, Inc.

## Innovative Thinking in the Care of Cardiac Surgical Patients

*To the Editor:*—We read with great interest, “Cardiac Surgery Fast-track Treatment in a Postanesthetic Care Unit” by Dr. Ender *et al.*<sup>1</sup> Application of this fast-track concept in Leipzig has been met with good results for a wide variety of cardiac surgical patients. Modern perioperative management is faced with the challenge of finding a balance between safe and efficacious results. The objective of fast-track cardiac surgery includes early extubation, reduction of intensive care unit length of stay, and reduction of the total hospital length of stay. This is accomplished with the use of short-acting opioids and hypnotics along with expeditious surgical procedures facilitating early extubation after cardiac surgery. In addition the Leipzig fast-track concept avoids intensive care unit admission in selected patients. Similarly, our institution attempts to expedite the management of cardiac patients by using a preanesthetic clinic specialized for day admission cardiac and major vascular surgeries. Day admission

surgery is nearly routine in the United States due to desires to decrease costs and resource utilization. Addition of such a preanesthetic clinic to the Leipzig fast-track method would further decrease costs by several mechanisms. Preanesthetic clinics specialized for cardiac and major vascular surgery (thoracic aortic aneurysm) patients are useful to ensure patient safety in a complicated population while avoiding unnecessary expenditures. Furthermore, enhancement of patient satisfaction throughout the surgical process is documented with specialized cardiac preanesthetic clinics.<sup>2</sup> A combination of a specialized preanesthetic clinic and the Leipzig fast-track concept may provide the necessary link in modern cardiovascular perioperative medicine in order to safely decrease costs.

**George Silvay, M.D., Ph.D.,\* Brigid C. Flynn, M.D.** \*Mount Sinai School of Medicine, New York, New York. george.silvay@msnyuhealth.org

## References

1. Ender J, Borger MA, Scholz M, Funkat AK, Anwar N, Sommer M, Mohr FW, Fassl J: Cardiac surgery fast-track treatment in a postanesthetic care unit. Six-month results of the Leipzig fast-track concept. *Anesthesiology* 2008; 109:61-6

2. Silvey G, Flynn B, DePerio M, Hughes I: Characteristics of preanesthetic clinic for day admission cardiac and major vascular surgery. *Anesth Analg*. 2008; 106(Suppl. 3):S-37

(Accepted for publication October 20, 2008.)

*Anesthesiology* 2009; 110:436

Copyright © 2009, the American Society of Anesthesiologists, Inc. Lippincott Williams & Wilkins, Inc.

**In Reply:**—We appreciate the suggestions that Dr. Silvey has pointed out in his letter to the editor in response to our article about the Leipzig Fast-Track Concept.<sup>1</sup> The concept of a preevaluation clinic as described by Dr. Silvey is a powerful tool to optimize safety for the patients and to avoid unnecessary expenditures.<sup>2</sup>

But one has to differentiate costs incurring for the health system itself and reimbursement of the actual costs for the individual hospital by the health care system. To reduce costs for the individual hospital significantly, one has to look for the real cost driver during the hospital stay of the patient. One of the most intensive cost drivers in each hospital is the intensive care unit.<sup>3</sup> With our fast-track concept, we can completely avoid the stay in the intensive care unit for most of the planned fast-track patients. Reimbursement for preclinical evaluation of the patient is not possible for hospitals in the German health care system. The German health care system is based on diagnosis-related groups, a classification of hospital cases expected to have similar hospital resource use.<sup>4</sup> Therefore, the hospital gets a fixed fee, for example, for the surgical treatment of aortic valve stenosis, regardless of the actual costs incurred, based on the principle diagnosis, surgical procedure used, age of patient, and expected length of stay in hospital. Preoperative evaluation of the patient is usually performed by the physician, who transfers the patient to the hospital for treatment. Unevaluated diagnostics are performed in the hospital the day prior to surgery after admission to the ward. The admission ward itself is not a cost-intensive unit of the hospital; as long as the patient does not exceed the mean length of stay in the hospital as defined in the diagnosis-related groups, the hospital will save money. However, treatment in a preevaluation

clinic, as previously mentioned, is not covered by the diagnosis-related group system. Often we receive patients who have come from a great distance, and hence prior admission to the preevaluation clinic would add to the cost of the hospital. This may be different to the reimbursement practice in the United States.

However, we agree with Dr. Silvey that a combination of a preevaluation clinic and the Leipzig Fast-Track concept will enhance patient satisfaction throughout the surgical process and can lead to further cost reduction for the health care system itself.

**Joerg Ender, M.D.,\* Friedrich W. Mohr, M.D., Ph.D., Jens Fassl, M.D.** \*University of Leipzig, Leipzig Heart Center, Leipzig, Germany. joerg.ender@medizin.uni-leipzig.de

## References

1. Ender J, Borger MA, Scholz M, Funkat AK, Anwar N, Sommer M, Mohr FW, Fassl J: Cardiac surgery fast-track treatment in a postanesthetic care unit. Six-month results of the Leipzig Fast-track Concept. *ANESTHESIOLOGY* 2008; 109:61-6

2. Silvey G, Flynn B, DePerio M, Hughes I: Characteristics of preanesthetic clinic for day admission cardiac and major vascular surgery. *Anesth Analg* 2008; 106(suppl. 3):S-37

3. Cheng DCH, Karski J, Peniston C: Early tracheal extubation after coronary artery bypass graft surgery reduces costs and improves resource use: A prospective randomized controlled trial. *ANESTHESIOLOGY* 1996; 85:1300-10

4. Roeder N, Rochell B, Juhra C: Empirical comparison of DRG variants using cardiovascular surgery data: initial results of a project at 18 German hospitals. *Aust Health Rev* 2001; 24:57-80

(Accepted for publication on October 31, 2008.)
